1 **Voltage-sensitive sodium channel (*Vssc*) mutations associated with pyrethroid**  
2 **insecticide resistance in *Aedes aegypti* (L.) from Jeddah, Kingdom of Saudi Arabia –**  
3 **baseline information for a *Wolbachia* release program**

4

5 Nancy M. Endersby-Harshman<sup>1\*</sup>, AboElgasim Ali<sup>2</sup>, Basim Alhumrani<sup>2</sup>, Mohammed Abdullah Alkuriji<sup>2</sup>,

6 Mohammed B. Al-Fageeh<sup>2</sup>, Abdulaziz Al-Malik<sup>2</sup>, Mohammed S. Alsuabeyl<sup>2</sup>, Samia Elfekih<sup>1,3</sup> & Ary A.

7 Hoffmann<sup>1</sup>

8

9 <sup>(1)</sup> PEARG, School of BioSciences, Bio21 Institute, 30 Flemington Rd, Parkville, The University of Melbourne,

10 VIC, Australia

11 <sup>(2)</sup> King Abdul-Aziz City for Science and Technology (KACST), Saudi Arabia

12

13 <sup>(3)</sup> CSIRO, Australian Centre for Disease Preparedness, Geelong, VIC, Australia

14 \*corresponding author, [nancye@unimelb.edu.au](mailto:nancye@unimelb.edu.au)

15

16 **Abstract**

17 **Background**

18 Dengue suppression often relies on control of the mosquito vector, *Aedes aegypti*, through applications of  
19 insecticides of which the pyrethroid group has played a dominant role. Insecticide resistance is prevalent in  
20 *Ae. aegypti* around the world and the resulting reduction of insecticide efficacy is likely to exacerbate the  
21 impact of dengue. Dengue has been a public health problem in Saudi Arabia, particularly in Jeddah, since its  
22 discovery there in the 1990s and insecticide use for vector control is widespread throughout the city. An  
23 alternative approach to insecticide use, based on blocking dengue transmission in mosquitoes by the  
24 endosymbiont *Wolbachia*, is being trialled in Jeddah following the success of this approach in Australia and  
25 Malaysia. Knowledge of insecticide resistance status of mosquito populations in Jeddah is a prerequisite for  
26 establishing a *Wolbachia*-based dengue control program as releases of *Wolbachia* mosquitoes succeed when  
27 resistance status of the release population is similar to that of the wild population.

28 **Methods**

29 WHO resistance bioassays of mosquitoes with deltamethrin, permethrin and DDT were used in conjunction  
30 with TaqMan<sup>®</sup> SNP Genotyping Assays to characterise mutation profiles of *Ae. aegypti* from Jeddah.

31 **Results**

32 Screening of the voltage sensitive sodium channel (*Vssc*), the pyrethroid target-site, revealed mutations at  
33 codons 989, 1016 and 1534 in *Ae. aegypti* from two districts of Jeddah. The triple mutant homozygote  
34 (1016G/1534C/989P) was confirmed from Al Safa and Al Rawabi. Bioassays with pyrethroids (Type I and II) and  
35 DDT showed that mosquitoes were resistant to each of these compounds based on WHO definitions. An  
36 association between *Vssc* mutations and resistance was established for the Type II pyrethroid, deltamethrin,  
37 with one genotype (989P/1016G/1534F) conferring a survival advantage over two others (989S/1016V/1534C  
38 and the triple heterozygote). An indication of synergism of Type I pyrethroid activity with piperonyl butoxide

39 suggests that detoxification by cytochrome P450s accounts for some of the pyrethroid resistance response in  
40 *Ae. aegypti* populations from Jeddah.

#### 41 **Conclusions**

42 The results provide a baseline for monitoring and management of resistance as well as knowledge of *Vssc*  
43 genotype frequencies required in *Wolbachia* release populations to ensure homogeneity with the target field  
44 population.

45

46

47 **Key words:** dengue, mosquito, target-site, knockdown resistance (*kdr*), permethrin, deltamethrin, DDT

## 48 **Background**

49 Target-site resistance to pyrethroids in *Aedes aegypti*, also known as knockdown resistance (*kdr*), is an  
50 autosomal, incompletely recessive trait (1). *Vssc* mutations at codons 1016 and 1534 occur in *Ae. aegypti*  
51 within the pyrethroid receptor sites in Domains II (S6) and III (S6) of the protein molecule (2). A third mutation,  
52 S989P, which is often in perfect linkage with V1016G, is not known to reduce the sensitivity of the sodium  
53 channel (2), but confers some additive pyrethroid resistance in the homozygous state in combination with  
54 1016G (3).

55 Pyrethroid resistance and *Vssc* mutations have been identified in *Ae. aegypti* from the Kingdom of Saudi Arabia  
56 and discussed in several studies (4-7). These three mutation sites are being screened routinely in samples of  
57 *Ae. aegypti* from Jeddah and are labelled as S989P, V1016G and F1534C (Figure 1) according to the codon  
58 numbering in the sequence of the most abundant splice variant of the house fly, *Musca domestica*, *Vssc*  
59 (GenBank accession nos. AAB47604 and AAB47605) (8). However, direct links between these mutations and  
60 resistance phenotypes in this locality are still unclear.

61 Dengue has been a public health problem in Saudi Arabia and particularly in Jeddah since its discovery there  
62 in 1994 (9). Currently, dengue suppression relies on control of the mosquito vector, *Aedes aegypti*, through  
63 the applications of insecticides of which the pyrethroid group has played a dominant role (5). Insecticide  
64 resistance is prevalent in *Ae. aegypti* around the world (10, 11) and the resulting reduction of insecticide  
65 efficacy is likely to be exacerbating the impact of dengue and certainly threatens the long-term utility of this  
66 control method. Hence an alternative approach based on blocking dengue transmission in mosquitoes by the  
67 endosymbiont *Wolbachia* is being trialled following the success of this approach in suppressing dengue in  
68 other countries (12, 13). Preparation for a release of *Wolbachia*-infected mosquitoes for control of dengue  
69 transmission has commenced in Jeddah in the Kingdom of Saudi Arabia.

70 Knowledge of the insecticide resistance status of mosquito populations in Jeddah is one prerequisite for  
71 establishing a *Wolbachia*-based dengue control program. The presence and frequency of the mutants can be  
72 used as a measure of resistance in the local population of *Ae. aegypti* that can be compared with *Wolbachia*-

73 infected mosquitoes destined for release. Mosquitoes are screened for mutations in the voltage-sensitive  
74 sodium channel (*Vssc*), the target site of pyrethroid insecticides and DDT (14) to characterise the population  
75 from the field for comparison with the future population for release. Similar releases of *Wolbachia* mosquitoes  
76 have been shown to succeed when insecticide resistance status of the release population is similar to that in  
77 the field (12, 15) and to fail or strike difficulties if the release population of mosquitoes does not carry  
78 equivalent resistance traits (16, 17). Although a *Wolbachia* program is not based on insecticide use, it is a  
79 reality that released mosquitoes will be exposed to insecticides in the field and therefore, must initially be  
80 able to survive in such an environment.

81 In this study we aimed:

- 82 1. To characterise the *Vssc* mutations 989/1016/1534 and haplotypes in the *Ae. aegypti* populations in  
83 Jeddah in two areas (Al Safa and Al Rawabi) to compare with known haplotype patterns in other parts  
84 of the world
- 85 2. To compare the distribution of these *Vssc* mutations in dead and surviving mosquitoes from bioassays  
86 with insecticides that target the *Vssc* (Type I and Type II pyrethroids as well as DDT which shows a  
87 similar mode of action to Type I pyrethroids (18))
- 88 3. To screen for the presence of a fourth mutation (codon 410) known to confer pyrethroid resistance to  
89 *Ae. aegypti* in a restricted number of locations (19-21) and, if found, to characterize this mutation in  
90 bioassay dead and surviving mosquitoes by sequencing a region of *Vssc* Domain I where this mutation  
91 may be located
- 92 4. To screen for a mutation in codon 1763, known from *Ae. aegypti* in Taiwan (22, 23) which does not  
93 affect the sensitivity of the *Vssc* (2), but may play a similar role to S989P in enhancing resistance  
94 conferred by the other mutations (22).
- 95 5. To use a synergist bioassay to find evidence of a metabolic component of pyrethroid resistance in *Ae.*  
96 *aegypti* from Jeddah

97 Knowledge about insecticide resistance in *Ae. aegypti* from the potential *Wolbachia* release sites is needed to  
98 ensure that similar traits are found in the strains of mosquitoes to be released to facilitate their survival under  
99 continued pressure of insecticide applications. This knowledge is also essential in developing long term  
100 insecticide resistance management strategies for Jeddah.

101

## 102 **Methods**

### 103 *Sample collection*

104 Mosquitoes were sampled in Al Safa-9 district located in central Jeddah and Al Rawabi district in the southern  
105 part of the city on three occasions (August 2018, October 2019 and February 2020) using oviposition bucket  
106 traps. The field sampling was performed over a two-week period for each operation and felts were collected  
107 twice and brought to the lab for rearing in separate containers, from which we tested an average of 10-12  
108 mosquito samples (larval and adult stages). Mosquito colonies were built and maintained in the Jeddah lab  
109 using larvae collected from various collection points in Safa-9 district. Mosquitoes from these wild colonies  
110 were used for the WHO bioassays.

### 111 *WHO bioassays*

112 The standard WHO insecticide resistance bioassay involving insecticide-impregnated papers was used for adult  
113 mosquitoes (24, 25). 25 female adults aged less than 5 days post-eclosion and non blood fed were used as the  
114 test subjects. Five replicates and one control were used for each bioassay. Controls comprised the relevant  
115 solvent used for the insecticide papers (silicone oil for pyrethroids). The mosquitoes were exposed in WHO  
116 tubes to impregnated paper with diagnostic concentrations of deltamethrin (0.05%), permethrin (0.75%) or  
117 DDT (4%). Bioassays to test for synergism of permethrin 0.75% were conducted by exposing mosquitoes to  
118 piperonyl butoxide (PBO) (4%) for one hour followed by exposure to permethrin (0.75%) for an additional  
119 hour. Insecticide impregnated papers were purchased from the Vector Control Research Unit, Universiti Sains  
120 Malaysia, Penang. Knockdown was scored every ten minutes for a 1 h exposure period. After exposure, the

121 mosquitoes were transferred into clean tubes and were supplied with cotton soaked in 10% sugar solution.  
122 Mortality was recorded after 24 h. Classification of resistance status was made based on pre-determined WHO  
123 guidelines in which mortality of <90% is characterized as resistant. Bioassays were repeated until at least 40  
124 dead and 40 survivors could be collected for each insecticide to be used for analysis of *Vssc* mutations.  
125 Mosquitoes from the bioassays were stored in absolute ethanol.

#### 126 *DNA extraction*

127 DNA was extracted from adult mosquitoes or late instar larvae using either the DNeasy® Blood and Tissue kit  
128 (QIAGEN Sciences, Maryland, USA), the Roche High Pure PCR template kit (Roche Molecular Systems, Inc.,  
129 Pleasanton, CA, USA) according to the instructions of the manufacturer or extracted using Chelex® 100 resin  
130 (Bio-Rad Laboratories Inc., Hercules, CA USA). Two final elutions of DNA were made from the kit extractions  
131 with the first being used for construction of genomic libraries for a related study and the second being used  
132 for screening of *Vssc* mutations after being diluted 1:5 with water. The same dilution factor was used for DNA  
133 extracted using Chelex® 100 resin on samples which were not to be used for construction of genomic libraries.

134

#### 135 *Screening of Vssc mutations*

##### 136 989/1016/1534

137 Custom TaqMan® SNP Genotyping Assays (Life Technologies, California, USA) were developed for each of the  
138 three target site mutations (codons 989, 1016, 1534) and were run on the Roche LightCycler® 480 (26).  
139 Endpoint genotyping was conducted using the Roche LightCycler® 480 Software Version 1.5.1.62.

140

##### 141 410 and 1763

142 A subset of samples was screened for a mutation at codon 410 in Domain I of the *Vssc* and codon 1763 in  
143 Domain IV by PCR and Sanger sequencing. Primers used to amplify the region around codon 410 (exon 10 in  
144 Domain I) of the *Vssc* were aegSCF10 (5'-GTGTTACGATCAGCTGGACC-3' and aegSCR10 (5'-

145 AAGCGCTTCTTCCTCGGC-3') from Tancredi *et al.* (27). Primers to amplify codon 1763 in Vssc Domain IV were  
146 albSCF6 (5'-TCGAGAAGTACTTCGTGTCG-3') and albSCR8 (5'-AACAGCAGGATCATGCTCTG-3') (28). Amplicons  
147 were sequenced with albSCF7 (5'-AGGTATCCGAACGTTGCTGT-3') by Macrogen Inc., South Korea for Sanger  
148 sequencing.

149

150 A 25  $\mu$ L PCR master mix was set up as follows: 2.5  $\mu$ L Standard Taq (Mg-free) Reaction Buffer (10x) (B9015  
151 New England BioLabs Inc. Ipswich MA USA), 2.0  $\mu$ L dNTP mix (10mM total) (Bioline (Aust) Pty Ltd, Eveleigh  
152 NSW Australia), MgCl<sub>2</sub> (50 mM) (Bioline (Aust) Pty Ltd, Eveleigh NSW Australia), 1.25  $\mu$ L of each primer (10  
153  $\mu$ M) (aegSCF10 5'-GTGTTACGATCAGCTGGACC-3' and aegSCR10 5'-AAGCGCTTCTTCCTCGGC-3' from), 0.125  $\mu$ L  
154 IMMOLASE™ DNA Polymerase (5 u/ $\mu$ L) (Bioline (Aust) Pty Ltd, Eveleigh NSW Australia), 15.125  $\mu$ L PCR-grade  
155 water and 2  $\mu$ L DNA (1:10 dilution of Chelex®-extracted DNA). A PCR reaction of 95°C for 10 min, 35 cycles of  
156 95°C 30 s, 55°C 45 s, 72°C 45 s and a final extension at 72°C for 5 min was run on an Eppendorf Mastercycler®  
157 (Eppendorf AG, Hamburg Germany). Amplicons were observed on a 1.5% agarose gel (Bioline (Aust) Pty Ltd,  
158 Eveleigh NSW Australia) run for 40 min at 90 V stained with SYBR™ Safe DNA Gel Stain (Thermo Fisher Scientific  
159 Inc. Waltham MA USA) and viewed with a GelDoc XR Gel Documentation System (Bio-Rad Laboratories Inc.  
160 Hercules CA USA). Samples were sent to Macrogen Inc., South Korea, for Sanger sequencing. Amplicons for  
161 the codon 410 screen were sequenced with aegSCR10 and those for codon 1763 were sequenced with albSCF7  
162 (5'-AGGTATCCGAACGTTGCTGT-3'). Sequences were analysed with Geneious Prime Version 2020 (Biomatters  
163 Ltd.).

164

165 Samples screened were those collected in Al Rawabi and Al Safa in February 2020. Sequences were first aligned  
166 to KY747529 (19) for verification as *Aedes aegypti* Vssc and then to KY747530.1 for codon 410 (mutant L) (19)  
167 and MK495874 (wildtype D) and MK495875 (mutant Y) (23) for codon 1763 for identification of a possible  
168 mutation.

169



170 *Statistical analyses*

171 Vssc mutation data from Al Safa and Al Rawabi collected over three years were analyzed for site differences  
172 in genotype frequencies using contingency tables with significance tested through the chi-squared statistic.  
173 Monte Carlo tests were used to determine significance because expected values in some cells were particularly  
174 low even when data were combined across collection dates. These analyses were performed in IBM SPSS  
175 Statistics (IBM Corp., Armonk, NY, USA; 2013).

176

177 Odds ratios (with 95% confidence intervals) (29) were calculated to indicate the odds of an individual surviving  
178 exposure to an insecticide if it carried one particular genotype compared with another. An odds ratio of 1  
179 indicates that there is no relationship between survival and the genotype under investigation. If 95%  
180 confidence intervals of the odds ratio do not span the value “1” then this suggests that the genotype is  
181 associated with survival.

182

183 **Results**

184 *Vssc mutations in temporal field samples*

185 An initial sample of ten individuals per district identified Vssc genotypes seen in samples from Asia and the  
186 Indo-Pacific except for one individual from Safa which did not fit the pattern (a homozygous mutant at codon  
187 1016 and 989, but a heterozygote at 1534) (Table 1). Data from multiple studies (26, 30-33) suggest that  
188 certain haplotypes of the three mutation sites predominate in a population and there is little evidence of  
189 crossing over to disrupt the phase patterns found. The linkage patterns we have observed for these mutations  
190 in mosquitoes from Asia and the Indo-Pacific cannot produce individuals of genotype I found in Safa (Figure  
191 1). To obtain this genotype, one parent had to contribute a triple mutant haplotype (H5) and the other  
192 contributed a second haplotype (H1) that we see in Asia/ Indo-Pacific samples (Figure 2). Saudi Arabia is one  
193 of the few countries where the triple mutant genotype has been reported previously (5) and it was found as a

194 haplotype in the case here (two individuals of the same genotype) and also as four individuals made from a  
195 combination of the H5 and H2 haplotypes which we have called genotype J (Figure 2).

196

197 The second screen consisted of sixty samples from each study site (Al Rawabi and Al Safa Districts, Jeddah),  
198 collected in October 2019. Three of the *Vssc* genotypes (A, B, C – Figure 1) found in the mosquitoes collected  
199 from these sites in Saudi Arabia were those found in samples from the Indo-Pacific region (26). However, there  
200 was again, one individual from Al Safa with genotype I (Table 1).

201

202 The third sample of *Ae. aegypti* was taken in February 2020 and again sixty samples from each site were  
203 screened for *Vssc* mutations. Genotype I was again found in mosquitoes from Al Safa (Table 1). Genotype J,  
204 which also contains the triple mutant haplotype (Figure 2), was found in both Al Safa and Al Rawabi and triple  
205 mutant homozygotes (genotype K – Figure 2) were found in both Al Safa (two individuals) and Al Rawabi (one  
206 individual). Two genotypes found only in the Al Rawabi sample (D and E – Figure 1 - one individual of each)  
207 indicate that the triple wildtype haplotype is present in that district, but was not found as a homozygote. The  
208 frequency of each of the common genotypes (A, B, C) is similar between Al Safa and Al Rawabi (Table 1), but  
209 there are differences in distribution of the rare genotypes (Figure 3). When data for all sampling dates were  
210 combined, there was no significant difference in genotypes between mosquitoes sampled in Al Safa and Al  
211 Rawabi ( $\chi^2=7.27$ ,  $df=7$ ,  $P=0.401$ , 0.388-0.413, 99% confidence intervals).

212

213

214 *WHO Bioassays*

215

### 216 **1. Mortality**

217 None of the bioassays conducted showed mortality in the range 98–100% which would indicate susceptibility  
218 according to WHO guidelines (34). Permethrin 0.75% induced only 44.8% mortality and DDT 4% bioassays  
219 showed mortality ranging from 3.2 to 10.4% confirming a high level of resistance to these compounds in *Ae.*

220 *aegypti* from Jeddah. Four bioassays with deltamethrin 0.05% showed an average mortality just under 90%  
221 which indicates that the population of *Ae. aegypti* from Jeddah is resistant to this compound as well (Table 2).

## 222 **2. Synergist bioassay**

223 Odds of mosquitoes being alive if exposed to permethrin 0.75% alone are just over twice those if exposed to  
224 permethrin 0.75% + PBO 4% (Table 3). PBO 4% alone caused some mortality, but the odds of being alive are  
225 not greater if exposed to permethrin compared with exposure to PBO alone (Table 3).

226

## 227 **3. Comparison of *Vssc* genotypes in dead and survivors**

228 Five *Vssc* genotypes (A, B, C/L, J, K) were identified in the surviving pool of mosquitoes screened and four  
229 genotypes (A, B, C/L, J) occurred in the dead mosquitoes exposed to 0.75% permethrin (Table 4). Two triple  
230 mutants were found in the survivors. There was no significant difference ( $\alpha=0.05$ ) in the odds of being alive  
231 after exposure to permethrin 0.75% if carrying one genotype over any other (Supplementary Table A).

232

233 Survivors of deltamethrin 0.05% fell into four genotypes as did the dead individuals, though the fourth and  
234 least frequent genotype differed between them (I for alive and J for dead) (Table 4). Odds ratios were  
235 significant ( $\alpha=0.05$ ) for two genotype comparisons indicating that the odds of surviving were higher for  
236 individuals of genotype A than genotype B and also higher for genotype A than the triple heterozygote  
237 (genotype C or L) (Table 5).

238

239 Five genotypes (A, B, C/L, I, J) occurred in both survivors of DDT 4% and in the dead individuals (A, B, C/L, I, J)  
240 (Table 4). There was no significant difference ( $\alpha=0.05$ ) in the odds of being alive after exposure to DDT 4% if  
241 carrying one genotype over any other (Supplementary Table B).

242

## 243 *Codons 410 and 1763*

244 32 sequences of 93-95 bp in length (30 from mosquitoes from Al Rawabi and two from Al Safa) were obtained  
245 for codon 410. Each sequence was wildtype at codon 410, coding for valine (V). 93 sequences of 117 bp in

246 length were obtained for codon 1763 (47 from mosquitoes from Al Rawabi and 46 from Al Safa). Each sequence  
247 was identical and wildtype, coding for aspartic acid (D) at codon 1763.

248

## 249 Discussion

250

251 *Vssc* mutations at codons 989, 1016 and 1534 are present in *Ae. aegypti* from two districts of Jeddah  
252 representing potential future release sites for *Wolbachia* mosquitoes for control of dengue. The populations  
253 are not fixed for one genotype, but genotypes A, B, C are common and no homozygote wildtype individuals  
254 were found in the sample. A wildtype haplotype exists, at least in Al Rawabi, so it is possible that homozygous  
255 wildtype individuals (genotype F) may occur in the population, albeit rarely. There is no indication that this  
256 haplotype still exists in Al Safa, but increased sampling might still find it. No instances of a mutation at codons  
257 410 or 1763 were observed in the samples screened indicating lack of independent selection or contact of the  
258 mosquito populations with those from Taiwan (22), Brazil (19), Mexico (35) or West and Central Africa (20).

259 The triple mutant homozygote (1016G/1534C/989P) (genotype K – Figure 2) can now be confirmed from Al  
260 Safa and Al Rawabi, suggesting that *Ae. aegypti* from Saudi Arabia may have a unique population history which  
261 could be further explored in a full genomic analysis. The implications of finding the triple mutant as haplotype  
262 5 and genotypes I – L are not well understood, but provide an opportunity to study effects of these genotypes  
263 in more detail in bioassays and potentially fitness experiments. Although the triple mutant genotype is rare in  
264 the populations of *Ae. aegypti* sampled from Jeddah (2-3%), the frequency is higher than that reported from  
265 Myanmar (0.98%) (32) and is high enough to facilitate collection of adequate numbers to isolate individuals  
266 for crossing experiments which could allow further characterisation of the H5 haplotype and I-L genotypes in  
267 bioassays. Two triple homozygous mutants were found in the live pool of our bioassay with permethrin 0.75%.

268 The *Vssc* genotypes found in Al Safa and Al Rawabi may all be constructed from haplotypes 1,2,3 and 5.  
269 Haplotype 4, found only in Taiwan of the countries sampled in the Indo-Pacific (26) and in Indonesia (3), is not  
270 found in the Saudi Arabian samples we have screened which is consistent with results of Al Nazawi, Aqili (5).

271 It is possible that the triple heterozygous genotype in Saudi Arabia could be composed of either H1 + H2 (usual  
272 condition in the Indo-Pacific – genotype C) or H3 + H5 (triple wildtype plus triple mutant – genotype L) (Figure  
273 4). Both H3 and H5 are rare compared with H1 and H2, but there is a possibility that some of the heterozygotes  
274 have this rare configuration. It is not known whether there is any difference in insecticide resistance in  
275 mosquitoes which have one or the other haplotype combinations of the triple heterozygote.

276 Potential implications of the genotypes A-E and I-K on control of *Ae. aegypti* with pyrethroid insecticides have  
277 been surmised (Table 6) (5, 30, 36), but not all genotypes have been tested for effects on susceptibility. It is  
278 likely that efficacy of both Type I and Type II pyrethroids is compromised by many of these modifications to  
279 the *Vssc*, though genotypes have differential effects.

280 Although resistance to three insecticides which target the *Vssc* was detected in bioassays in the *Ae. aegypti*  
281 from Jeddah in this study, the only clear association between *Vssc* mutations and resistance was established  
282 for the Type II pyrethroid, deltamethrin, with genotype A conferring a survival advantage compared with  
283 genotypes B (1534C) or C (triple heterozygote). Genotype A is known to reduce the sensitivity of the *Vssc* for  
284 both Type I and Type II pyrethroids (2), but in our study there was no obvious effects for Type I (permethrin  
285 0.75%) or DDT. It may be that this lack of effect is concentration related and a different concentration of  
286 permethrin or DDT would reveal a segregation of genotypes between dead and surviving mosquitoes as  
287 reported from the Jazan region of Saudi Arabia (4). In a similar study in *Ae. aegypti* from Malaysia (15), a  
288 survival advantage over wildtype was conferred to mosquitoes by genotypes B and C when exposed to  
289 permethrin 0.25%.

290 It is important to note that target-site resistance may not be the only mechanism of resistance to pyrethroids  
291 that has been selected in the Jeddah populations of *Ae. aegypti*. A role of metabolic resistance in *Ae. aegypti*  
292 from Al Safa and Al Rawabi is likely. Al Nazawi et al. (5) saw an increase in mortality of *Ae. aegypti* from Jeddah  
293 with deltamethrin, using the synergist (PBO), which indicates that detoxification by oxidases (cytochrome P450  
294 mixed function oxidase system) accounts for some of the pyrethroid resistance response. We also found an  
295 indication of such synergism in bioassays with the Type I pyrethroid, permethrin 0.75%.

296 **Conclusions**

297 The continuing presence of the wildtype haplotype and minor difference in genotypes between Al Safa and Al  
298 Rawabi suggests that selection for resistance may be patchy between districts. Changes in genotype  
299 frequencies over time also suggest that selection for pyrethroid resistance is ongoing. The results provide a  
300 baseline for ongoing monitoring of resistance particularly with implementation of resistance management  
301 programs and also indicate *Vssc* genotypes required in *Wolbachia* release populations to ensure homogeneity  
302 with the target field population.

303 **Declarations**

304 Ethics approval and consent to participate – not applicable

305 Consent for publication – not applicable

306 Availability of data and materials - All data generated or analysed during this study are included in this  
307 published article [and its supplementary information files].

308 Competing interests - The authors declare that they have no competing interests.

309 Funding - The study was funded under the KACST-CSIRO co-investment Collaborative research agreement  
310 [ETSC&KACST-CSIRO-2018-12-30-21] on “Management strategies of vector-borne disease in Saudi Arabia:  
311 feasibility of the *Wolbachia*-based approach as an alternative to chemical pesticides”.

312

313 Authors' contributions – NMEH, AAH and SE designed the study and wrote the paper. AEA conducted all WHO  
314 bioassays. NMEH conducted DNA extraction, SNP genotyping and sample preparation for DNA sequencing.  
315 NMEH and AAH analysed the data. BB, MA, MAF, AAM and MSA provided research services for the study and  
316 reviewed the manuscript.

317

318

319 **Acknowledgements**

320 Thanks to the field operations teams in Safa and Rawabi districts, led by Dr Abdulghaffar Azhari, for  
321 collecting mosquitoes and to all team members involved in DNA extractions and bioassays

322

323

**References**

324

- 325 1. Chang C, Huang X-Y, Chang P-C, Wu H-H, Dai S-M. Inheritance and stability of sodium channel  
326 mutations associated with permethrin knockdown resistance in *Aedes aegypti*. *Pesticide Biochemistry &*  
327 *Physiology*. 2012;104(2):136-42.
- 328 2. Du Y, Nomura Y, Satar G, Hu Z, Nauen R, He SY, et al. Molecular evidence for dual pyrethroid-receptor  
329 sites on a mosquito sodium channel. *Proceedings of the National Academy of Sciences*. 2013;110(29):11785-  
330 90.
- 331 3. Wuliandari J, Lee S, White V, Tantowijoyo W, Hoffmann A, Endersby-Harshman N. Association  
332 between three mutations, F1565C, V1023G and S996P, in the voltage-sensitive sodium channel gene and  
333 knockdown resistance in *Aedes aegypti* from Yogyakarta, Indonesia. *Insects*. 2015;6(3):658.
- 334 4. Dafalla O, Alsheikh A, Mohammed W, Shrwani K, Alsheikh F, Hobani Y, et al. Knockdown resistance  
335 mutations contributing to pyrethroid resistance in *Aedes aegypti* population, Saudi Arabia. *Eastern*  
336 *Mediterranean Health Journal*. 2019;25:905-13.
- 337 5. Al Nazawi AM, Aqili J, Alzahrani M, McCall PJ, Weetman D. Combined target site (*kdr*) mutations play  
338 a primary role in highly pyrethroid resistant phenotypes of *Aedes aegypti* from Saudi Arabia. *Parasites &*  
339 *Vectors*. 2017;10(1):161.
- 340 6. Alsheikh AA, Mohammed WS, Noureldin EM, Daffalla OM, Shrwani YA, Hobani KJ, et al. Studies on  
341 *Aedes aegypti* resistance to some insecticides in the Jazan District, Saudi Arabia. *Journal of the Egyptian Society*  
342 *of Parasitology*. 2016;46(1):209-16.
- 343 7. Aziz AT, Dieng H, Hassan AA, Satho T, Miake F, Salmah MRC, et al. Insecticide susceptibility of the  
344 dengue vector *Aedes aegypti* (Diptera: Culicidae) in Makkah City, Saudi Arabia. *Asian Pacific Journal of Tropical*  
345 *Disease*. 2011;1(2):94-9.
- 346 8. Kasai S, Komagata O, Itokawa K, Shono T, Ng LC, Kobayashi M, et al. Mechanisms of pyrethroid  
347 resistance in the dengue mosquito vector, *Aedes aegypti*: target site insensitivity, penetration, and  
348 metabolism. *PLOS Neglected Tropical Diseases*. 2014;8(6):e2948.
- 349 9. Fakeeh M, Zaki AM. Virologic and serologic surveillance for dengue fever in Jeddah, Saudi Arabia,  
350 1994-1999. *American Journal of Tropical Medicine and Hygiene*. 2001;65(6):764-7.
- 351 10. Smith LB, Kasai S, Scott JG. Pyrethroid resistance in *Aedes aegypti* and *Aedes albopictus*: Important  
352 mosquito vectors of human diseases. *Pesticide Biochemistry & Physiology*. 2016;133:1-12.
- 353 11. Du Y, Nomura Y, Zhorov BS, Dong K. Sodium channel mutations and pyrethroid resistance in *Aedes*  
354 *aegypti*. *Insects*. 2016;7(4):1-11.
- 355 12. Nazni WA, Hoffmann AA, NoorAfizah A, Cheong YL, Mancini MV, Golding N, et al. Establishment of  
356 *Wolbachia* strain wAlbB in Malaysian populations of *Aedes aegypti* for dengue control. *Current Biology*.  
357 2019;29(24):4241-8.e5.
- 358 13. Ryan P, Turley A, Wilson G, Hurst T, Retzki K, Brown-Kenyon J, et al. Establishment of wMel *Wolbachia*  
359 in *Aedes aegypti* mosquitoes and reduction of local dengue transmission in Cairns and surrounding locations  
360 in northern Queensland, Australia [version 2; peer review: 2 approved]. *Gates Open Research*. 2020;3(1547).
- 361 14. Davies TGE, Field LM, Usherwood PNR, Williamson MS. DDT, pyrethrins, pyrethroids and insect sodium  
362 channels. *IUBMB Life*. 2007;59(3):151-62.
- 363 15. Ahmad NA, Endersby-Harshman NM, Mohd Mazni NR, Mohd Zabari NZ, Amran SN, Ridhuan Ghazali  
364 MK, et al. Characterization of sodium channel mutations in the dengue vector mosquitoes *Aedes aegypti* and



- 365 *Aedes albopictus* within the context of ongoing *Wolbachia* releases in Kuala Lumpur, Malaysia. *Insects*.  
366 2020;11(8).
- 367 16. Garcia GdA, Sylvestre G, Aguiar R, da Costa GB, Martins AJ, Lima JBP, et al. Matching the genetics of  
368 released and local *Aedes aegypti* populations is critical to assure *Wolbachia* invasion. *PLOS Neglected Tropical*  
369 *Diseases*. 2019;13(1):e0007023.
- 370 17. Garcia GA, Hoffmann AA, Maciel-de-Freitas R, Villela DAM. *Aedes aegypti* insecticide resistance  
371 underlies the success (and failure) of *Wolbachia* population replacement. *Scientific Reports*. 2020;10(1):63.
- 372 18. Du Y, Nomura Y, Zhorov BS, Dong K. Evidence for dual binding sites for 1,1,1-trichloro-2,2-bis(p-  
373 chlorophenyl)ethane (DDT) in insect sodium channels. *Journal of Biological Chemistry*. 2016;291(9):4638-48.
- 374 19. Haddi K, Tomé HVV, Du Y, Valbon WR, Nomura Y, Martins GF, et al. Detection of a new pyrethroid  
375 resistance mutation (V410L) in the sodium channel of *Aedes aegypti*: a potential challenge for mosquito  
376 control. *Scientific Reports*. 2017;7:46549.
- 377 20. Ayres CFJ, Seixas G, Borrego S, Marques C, Monteiro I, Marques CS, et al. The V410L knockdown  
378 resistance mutation occurs in island and continental populations of *Aedes aegypti* in West and Central Africa.  
379 *PLOS Neglected Tropical Diseases*. 2020;14(5):e0008216.
- 380 21. Villanueva-Segura OK, Ontiveros-Zapata KA, Lopez-Monroy B, Ponce-Garcia G, Gutierrez-Rodriguez  
381 SM, Davila-Barboza JA, et al. Distribution and frequency of the *kdr* mutation V410L in natural populations of  
382 *Aedes aegypti* (L.) (Diptera: Culicidae) from eastern and southern Mexico. *Journal of Medical Entomology*.  
383 2020;57(1):218-23.
- 384 22. Chang C, Shen W-K, Wang T-T, Lin Y-H, Hsu E-L, Dai S-M. A novel amino acid substitution in a voltage-  
385 gated sodium channel is associated with knockdown resistance to permethrin in *Aedes aegypti*. *Insect*  
386 *Biochemistry & Molecular Biology*. 2009;39(4):272-8.
- 387 23. Chung H-H, Cheng IC, Chen Y-C, Lin C, Tomita T, Teng H-J. Voltage-gated sodium channel intron  
388 polymorphism and four mutations comprise six haplotypes in an *Aedes aegypti* population in Taiwan. *PLOS*  
389 *Neglected Tropical Diseases*. 2019;13(3):e0007291.
- 390 24. WHO. Instructions for determining the susceptibility or resistance of mosquito larvae to insecticides.  
391 World Health Organization. <http://www.who.int/iris/handle/10665/69615>. 1981.
- 392 25. WHO. Monitoring and managing insecticide resistance in *Aedes* mosquito populations: interim  
393 guidance for entomologists. World Health Organization. <http://www.who.int/iris/handle/10665/204588>.  
394 2016.
- 395 26. Endersby-Harshman NM, Schmidt TL, Chung J, van Rooyen A, Weeks AR, Hoffmann AA. Heterogeneous  
396 genetic invasions of three insecticide resistance mutations in Indo-Pacific populations of *Aedes aegypti* (L.).  
397 *Molecular Ecology*. 2020.
- 398 27. Tancredi A, Papandrea D, Marconcini M, Carballar-Lejarazu R, Casas-Martinez M, Lo E, et al. Tracing  
399 temporal and geographic distribution of resistance to pyrethroids in the arboviral vector *Aedes albopictus*.  
400 *PLOS Neglected Tropical Diseases*. 2020;14(6):e0008350.
- 401 28. Kasai S, Ng LC, Lam-Phua SG, Tang CS, Itokawa K, Komagata O, et al. First detection of a putative  
402 knockdown resistance gene in major mosquito vector, *Aedes albopictus*. *Japanese Journal of Infectious*  
403 *Diseases*. 2011;64(3):217-21.
- 404 29. Sokal RR, Rohlf FJ. *Biometry : the principles and practice of statistics in biological research*. 3rd ed ed:  
405 W.H. Freeman; 1995.
- 406 30. Plernsub S, Saingamsook J, Yanola J, Lumjuan N, Tippawangkosol P, Sukontason K, et al. Additive effect  
407 of knockdown resistance mutations, S989P, V1016G and F1534C, in a heterozygous genotype conferring  
408 pyrethroid resistance in *Aedes aegypti* in Thailand. *Parasites & Vectors*. 2016;9(1):417.
- 409 31. Ishak IH, Jaal Z, Ranson H, Wondji CS. Contrasting patterns of insecticide resistance and knockdown  
410 resistance (*kdr*) in the dengue vectors *Aedes aegypti* and *Aedes albopictus* from Malaysia. *Parasites & Vectors*.  
411 2015;8(1):1-13.
- 412 32. Kawada H, Oo SZM, Thaung S, Kawashima E, Maung YNM, Thu HM, et al. Co-occurrence of point  
413 mutations in the Voltage-Gated Sodium Channel of pyrethroid-resistant *Aedes aegypti* populations in  
414 Myanmar. *PLOS Neglected Tropical Diseases*. 2014;8(7):1-8.



- 415 33. Stenhouse SA, Plernsub S, Yanola J, Lumjuan N, Dantrakool A, Choochote W, et al. Detection of the  
416 V1016G mutation in the voltage-gated sodium channel gene of *Aedes aegypti* (Diptera: Culicidae) by allele-  
417 specific PCR assay, and its distribution and effect on deltamethrin resistance in Thailand. *Parasites & Vectors*.  
418 2013;6(1):253.
- 419 34. WHO. Test procedures for insecticide resistance monitoring in malaria vector mosquitoes. Geneva,  
420 Switzerland: World Health Organisation; 2013.
- 421 35. Villanueva-Segura OK, Ontiveros-Zapata KA, Lopez-Monroy B, Ponce-Garcia G, Gutierrez-Rodriguez  
422 SM, Davila-Barboza JA, et al. Distribution and frequency of the *kdr* mutation V410L in natural populations of  
423 *Aedes aegypti* (L.) (Diptera: Culicidae) from eastern and southern Mexico. *Journal of medical entomology*.  
424 2020;57(1):218-23.
- 425 36. Hirata K, Komagata O, Itokawa K, Yamamoto A, Tomita T, Kasai S. A single crossing-over event in  
426 voltage-sensitive Na<sup>+</sup> channel genes may cause critical failure of dengue mosquito control by insecticides.  
427 *PLoS Neglected Tropical Diseases*. 2014;8(8):e3085.
- 428 37. Abbott W. A method of computing the effectiveness of an insecticide. *Journal of Economic*  
429 *Entomology*. 1925;18:265-7.
- 430 38. Hirata K, Komagata O, Itokawa K, Yamamoto A, Tomita T, Kasai S. A single crossing-over event in  
431 voltage-sensitive Na<sup>+</sup> channel genes may cause critical failure of dengue mosquito control by insecticides.  
432 *PLoS NegPLoS Neglected Tropical Diseases*. 2014;8(8):e3085.

433

434

#### 435 **List of Figures**

436 Figure 1. Indo-Pacific *Vssc* haplotypes and genotypes in *Aedes aegypti* (26)

437 Figure 2. *Vssc* genotypes that include the triple mutant haplotype (H5) in *Aedes aegypti* from Saudi Arabia

438

439 Figure 3. Comparison of frequency of *Vssc* genotypes in *Aedes aegypti* from Al Safa and Al Rawabi districts,  
440 Jeddah, Kingdom of Saudi Arabia

441

442 Figure 4. Putative configurations of *Vssc* triple mutant heterozygotes in *Aedes aegypti* from Saudi Arabia

443

444

Table 1. Voltage-sensitive sodium channel (*Vssc*) mutations in *Aedes aegypti* from Al Safa and Al Rawabi districts, Jeddah, 2018, 2019, 2020

| Genotype |     | Safa   |      | Safa   |      | Safa   |      | Rawabi |      | Rawabi |      | Rawabi |      |
|----------|-----|--------|------|--------|------|--------|------|--------|------|--------|------|--------|------|
|          |     | Aug-18 |      | Oct-19 |      | Feb-20 |      | Aug-18 |      | Oct-19 |      | Feb-20 |      |
|          |     | n      | freq | n      | freq | n      | freq | n      | freq | n      | freq | n      | freq |
| GG/GG/CC | K   | 0      | 0.00 | 0      | 0.00 | 2      | 0.03 | 0      | 0.00 | 0      | 0.00 | 1      | 0.02 |
| GG/TG/CC | I   | 1      | 0.10 | 1      | 0.02 | 2      | 0.03 | 0      | 0.00 | 0      | 0.00 | 0      | 0.00 |
| GG/TT/CC | A   | 1      | 0.10 | 20     | 0.33 | 15     | 0.25 | 4      | 0.40 | 17     | 0.28 | 11     | 0.18 |
| TG/GG/TC | J   | 0      | 0.00 | 0      | 0.00 | 2      | 0.03 | 0      | 0.00 | 0      | 0.00 | 1      | 0.02 |
| TG/TG/TC | C/L | 6      | 0.60 | 28     | 0.47 | 27     | 0.45 | 3      | 0.30 | 30     | 0.50 | 33     | 0.55 |
| TG/TT/TC | D   | 0      | 0.00 | 0      | 0.00 | 0      | 0.00 | 0      | 0.00 | 0      | 0.00 | 1      | 0.02 |
| TT/TG/TT | E   | 0      | 0.00 | 0      | 0.00 | 0      | 0.00 | 1      | 0.10 | 0      | 0.00 | 0      | 0.00 |
| TT/GG/TT | B   | 2      | 0.20 | 11     | 0.18 | 12     | 0.20 | 2      | 0.20 | 13     | 0.22 | 13     | 0.22 |
| Total    |     | 10     |      | 60     |      | 60     |      | 10     |      | 60     |      | 60     |      |

Test for site differences (all dates combined)  $\chi^2=7.27$ ,  $df=7$ ,  $P=0.401$  (0.388-0.413, 99% confidence intervals)

Table 2. WHO bioassays of *Aedes aegypti* from Jeddah, KSA using permethrin 0.75%, deltamethrin 0.05%, DDT 4% - % mortality and numbers in Vssc screen

\*corrected for control mortality using Abbott's (37) formula

| Batch | Date      | Status | Insecticide        | Tube 1 | Tube 2 | Tube 3 | Tube 4 | Tube 5 | Total | Control | % mortality | Vssc screen |
|-------|-----------|--------|--------------------|--------|--------|--------|--------|--------|-------|---------|-------------|-------------|
| 7     | 26-Sep-20 | DEAD   | permethrin 0.75%   | 10     | 8      | 17     | 13     | 8      | 56    | 0       | 44.8        | 40          |
| 7     | 26-Sep-20 | ALIVE  | permethrin 0.75%   | 15     | 17     | 8      | 12     | 17     | 69    | 25      |             | 40          |
| 1     | 2-Sep-20  | DEAD   | deltamethrin 0.05% | 16     | 17     | 18     | 18     | 15     | 84    | 0       | 84.0        | 10          |
| 1     | 2-Sep-20  | ALIVE  | deltamethrin 0.05% | 4      | 3      | 2      | 2      | 5      | 16    | 20      |             | 16          |
| 2     | 8-Sep-20  | DEAD   | deltamethrin 0.05% | 20     | 18     | 18     | 18     | 19     | 93    | 1       | 92.5*       | 10          |
| 2     | 8-Sep-20  | ALIVE  | deltamethrin 0.05% | 0      | 2      | 2      | 2      | 1      | 7     | 19      |             | 7           |
| 4     | 15-Sep-20 | DEAD   | deltamethrin 0.05% | 17     | 19     | 19     | 18     | 19     | 92    | 0       | 92.0        | 10          |
| 4     | 15-Sep-20 | ALIVE  | deltamethrin 0.05% | 3      | 1      | 1      | 2      | 1      | 8     | 25      |             | 8           |
| 5     | 17-Sep-20 | DEAD   | deltamethrin 0.05% | 19     | 18     | 17     | 18     | 18     | 90    | 0       | 90.0        | 10          |
| 5     | 17-Sep-20 | ALIVE  | deltamethrin 0.05% | 1      | 2      | 3      | 2      | 2      | 10    | 20      |             | 10          |
| 6     | 26-Sep-20 | DEAD   | DDT 4%             | 2      | 2      | 3      | 2      | 4      | 13    | 0       | 10.4        | 8           |
| 6     | 26-Sep-20 | ALIVE  | DDT 4%             | 23     | 23     | 22     | 23     | 21     | 112   | 25      |             | 10          |
| 26    | 7-Nov-20  | DEAD   | DDT 4%             | 2      | 3      | 2      | 3      | 2      | 12    | 0       | 9.6         | 12          |
| 26    | 7-Nov-20  | ALIVE  | DDT 4%             | 23     | 22     | 23     | 22     | 23     | 113   | 25      |             | 10          |
| 28    | 8-Nov-20  | DEAD   | DDT 4%             | 1      | 1      | 0      | 1      | 2      | 5     | 0       | 4.0         | 7           |
| 28    | 8-Nov-20  | ALIVE  | DDT 4%             | 24     | 24     | 25     | 24     | 23     | 120   | 25      |             | 10          |
| 29    | 9-Nov-20  | DEAD   | DDT 4%             | 0      | 1      | 2      | 0      | 1      | 4     | 0       | 3.2         | 4           |
| 29    | 9-Nov-20  | ALIVE  | DDT 4%             | 25     | 24     | 23     | 24     | 24     | 120   | 25      |             | 10          |
| 31    | 12-Nov-20 | DEAD   | DDT 4%             | 1      | 2      | 1      | 0      | 1      | 5     | 0       | 4.0         | 6           |
| 31    | 12-Nov-20 | ALIVE  | DDT 4%             | 24     | 23     | 24     | 25     | 24     | 120   | 25      |             | 0           |
| 33    | 14-Nov-20 | DEAD   | DDT 4%             | 2      | 3      | 2      | 1      | 2      | 10    | 0       | 8.0         | 0           |
| 33    | 14-Nov-20 | ALIVE  | DDT 4%             | 23     | 22     | 23     | 24     | 23     | 115   | 25      |             | 0           |

Table 3. WHO bioassays with permethrin 0.75% and synergist, piperonyl butoxide (PBO) and *Aedes aegypti* from Jeddah, KSA (OR = Odds Ratio,  $\alpha=0.05$ , \*=significance)

| Batch        | Status                           | permethrin 0.75% | PBO 4% only       | Insecticide + PBO 4% | Solvent control |
|--------------|----------------------------------|------------------|-------------------|----------------------|-----------------|
| 25           | Dead                             | 8                | 3                 | 13                   | 0               |
| 25           | Alive                            | 17               | 22                | 12                   | 75              |
| 24           | Dead                             | 9                | 5                 | 14                   | 0               |
| 24           | Alive                            | 16               | 20                | 11                   | 75              |
| 19           | Dead                             | 20               | 2                 | 23                   | 0               |
| 19           | Alive                            | 5                | 23                | 2                    | 75              |
| <b>Total</b> | Dead                             | 37               | 10                | 50                   | 0               |
|              | Alive                            | 38               | 65                | 25                   | 225             |
|              | <b>% mortality</b>               | 49.3             | 13.3              | 66.7                 | 0.0             |
|              |                                  | <b>OR</b>        | <b>Lower c.i.</b> | <b>Upper c.i.</b>    | $\alpha=0.05$   |
|              | <b>permethrin+PBO/permethrin</b> | 0.49             | 0.25              | 0.94                 |                 |
|              | <b>permethrin+PBO/PBO</b>        | 0.08             | 0.03              | 0.17                 |                 |
|              | <b>permethrin/PBO</b>            | 0.16             | 0.07              | 0.35                 |                 |
|              | <b>permethrin/permethrin+PBO</b> | 2.05             | 1.06              | 3.97                 | *               |
|              | <b>PBO/permethrin+PBO</b>        | 13.00            | 5.72              | 29.54                | *               |
|              | <b>PBO/permethrin</b>            | 6.33             | 2.83              | 14.16                | *               |

Table 4. Frequency (%) of *Vssc* mutations in dead and surviving *Ae. aegypti* mosquitoes from Jeddah from WHO bioassays with permethrin (0.75%), deltamethrin (0.05%) or DDT (4%) (Order of mutations is 1016/1534/989, T=wildtype, G or C =mutant)

| Insecticide               | <i>Vssc</i> Genotype |                 |                   |                 |                 |                 |
|---------------------------|----------------------|-----------------|-------------------|-----------------|-----------------|-----------------|
|                           | GG/TT/CC<br>(A)      | TT/GG/TT<br>(B) | TG/TG/TC<br>(C/L) | GG/TG/CC<br>(I) | TG/GG/TC<br>(J) | GG/GG/CC<br>(K) |
| <b>permethrin 0.75%</b>   |                      |                 |                   |                 |                 |                 |
| Alive (n=40)              | 30.0                 | 12.5            | 50.0              | 0.0             | 2.5             | 5.0             |
| Dead (n=40)               | 27.5                 | 30.0            | 40.0              | 0.0             | 2.5             | 0.0             |
| <b>deltamethrin 0.05%</b> |                      |                 |                   |                 |                 |                 |
| Alive (n=41)              | 43.9                 | 19.5            | 31.7              | 4.9             | 0.0             | 0.0             |
| Dead (n=40)               | 12.5                 | 27.5            | 57.5              | 0.0             | 2.5             | 0.0             |
| <b>DDT 4%</b>             |                      |                 |                   |                 |                 |                 |
| Alive (n=40)              | 25.0                 | 32.5            | 32.5              | 7.5             | 2.5             | 0.0             |
| Dead (n=39)               | 17.9                 | 28.2            | 41.0              | 2.6             | 10.3            | 0.0             |

Table 5. Odds of *Ae. aegypti* surviving with one *Vssc* genotype compared with another 24 h after a 1 h exposure to deltamethrin 0.05%. (OR =Odds Ratio with 95% confidence intervals) (\*=significance, NS=not significant as confidence intervals encompass 1) (T=wildtype, G or C =mutant)

| <b>deltamethrin 0.05%</b> | <b>OR</b>   | <b>LOWER</b> | <b>UPPER</b> | <b><math>\alpha=0.05</math></b> |
|---------------------------|-------------|--------------|--------------|---------------------------------|
| <b>GGTTCC/TTGGTT</b>      | <b>4.95</b> | <b>1.29</b>  | <b>19.01</b> | <b>*</b>                        |
| <b>GGTTCC/TGTGTC</b>      | <b>6.37</b> | <b>1.91</b>  | <b>21.18</b> | <b>*</b>                        |
| TTGGTT/TGTGTC             | 1.29        | 0.41         | 4.01         | NS                              |
| TTGGTT/GGTTCC             | 0.20        | 0.05         | 0.78         | NS                              |
| TGTGTC/GGTTCC             | 0.16        | 0.05         | 0.52         | NS                              |
| TGTGTC/TTGGTT             | 0.78        | 0.25         | 2.42         | NS                              |

Table 6. Pyrethroid resistance implications of voltage-sensitive sodium channel (*Vssc*) mutations in *Aedes aegypti* from the Kingdom of Saudi Arabia (Al Safa and Al Rawabi districts of Jeddah)

| Genotype | V1016G | F1534C | S989P | Resistance implication                                                                                                                                                                                                | Reference                                   |
|----------|--------|--------|-------|-----------------------------------------------------------------------------------------------------------------------------------------------------------------------------------------------------------------------|---------------------------------------------|
| A        | GG     | TT     | CC    | Confers resistance to Type I and type II pyrethroids (HIGH LEVEL)                                                                                                                                                     | Plernsub, Saingamsook (30)                  |
| B        | TT     | GG     | TT    | Confers resistance to Type I pyrethroids (LOW LEVEL)                                                                                                                                                                  | Plernsub, Saingamsook (30)                  |
| C        | TG     | TG     | TC    | Heterozygote (C) – confers low level of resistance to Type I and Type II pyrethroids (INTERMEDIATE LEVEL)                                                                                                             | Plernsub, Saingamsook (30)                  |
| D        | TG     | TT     | TC    | Type II pyrethroids (practically SUSCEPTIBLE)                                                                                                                                                                         | Plernsub, Saingamsook (30)                  |
| E        | TT     | TG     | TT    | May confer low level of resistance to Type I pyrethroids (not much higher than wildtype)                                                                                                                              | Plernsub, Saingamsook (30)                  |
| I        | GG     | TG     | CC    | Resistance level conferred by this genotype has not been fully ascertained – possibly susceptible to Type II pyrethroids.                                                                                             | Al Nazawi, Aqili (5)                        |
| J        | TG     | GG     | TC    | Resistance level conferred by this genotype has not been fully ascertained – possibly susceptible to Type II pyrethroids.                                                                                             | Al Nazawi, Aqili (5)                        |
| K        | GG     | GG     | CC    | Triple mutant homozygote – Extremely high resistance when created artificially in <i>Xenopus</i> oocytes – Resistance in nature not known. May have high fitness costs – possibly susceptible to Type II pyrethroids. | Hirata, Komagata (38), Al Nazawi, Aqili (5) |
| L        | TG     | TG     | TG    | Putative triple heterozygote (L) – resistance level conferred, if any, is not known.                                                                                                                                  | -                                           |

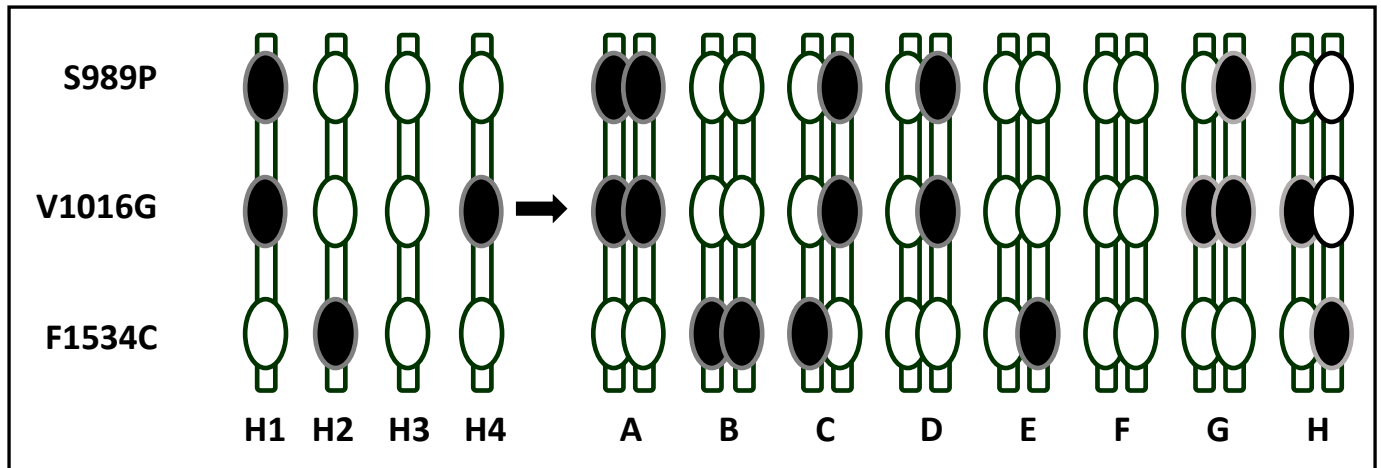

Figure 1. Indo-Pacific *Vssc* haplotypes and genotypes in *Aedes aegypti* (26)



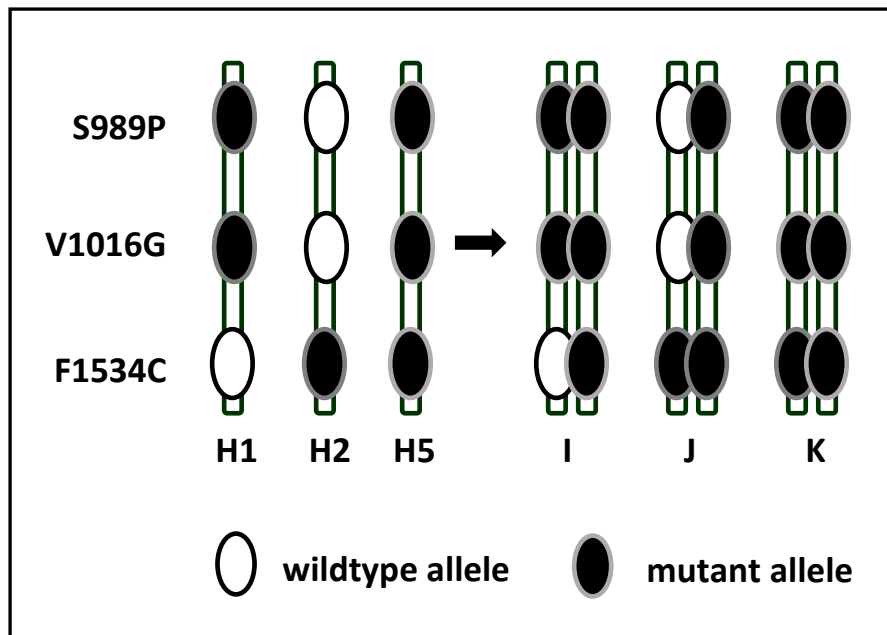

Figure 2. *Vssc* genotypes that include the triple mutant haplotype (H5) in *Aedes aegypti* from Saudi Arabia

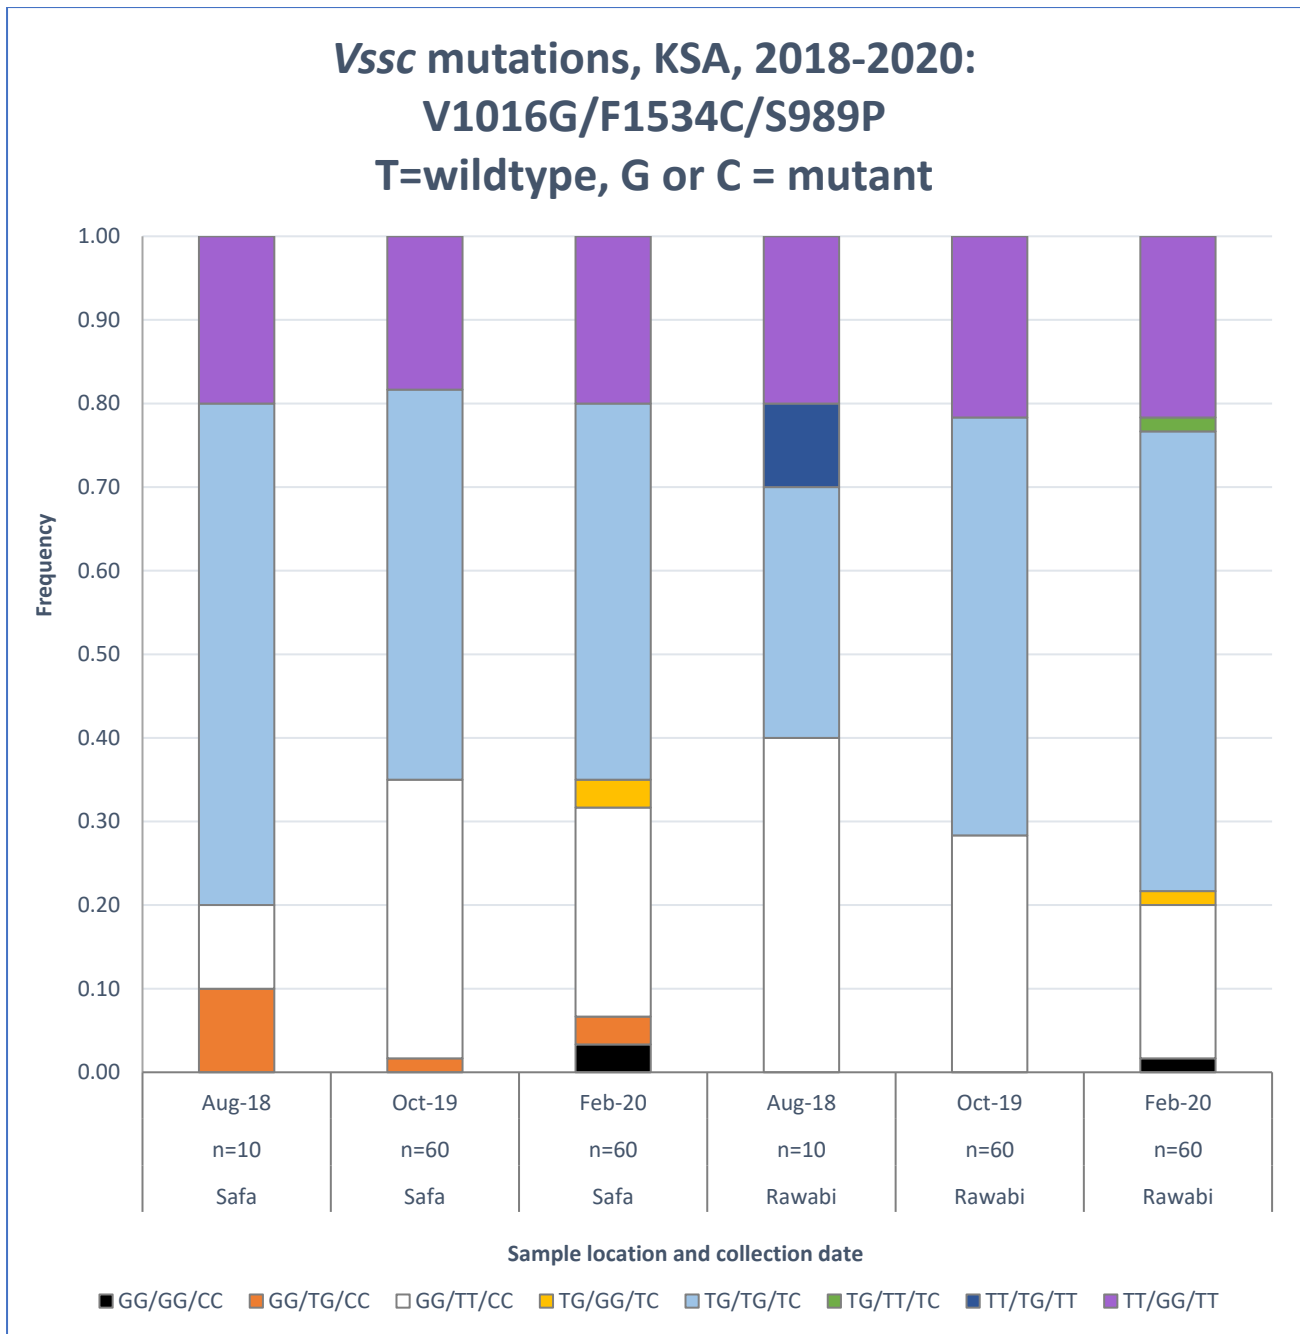

Figure 3. Comparison of frequency of Vssc genotypes in *Aedes aegypti* from Al Safa and Al Rawabi districts, Jeddah, Kingdom of Saudi Arabia

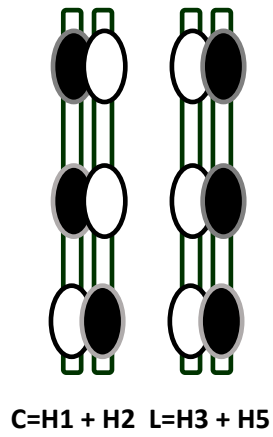

Figure 4. Putative configurations of *Vssc* triple mutant heterozygotes in *Aedes aegypti* from Saudi Arabia
